# Supplementary material
Source: publisher site journal article supplement (https://static.cambridge.org/content/id/urn:cambridge.org:id:article:S0008347X19000336/resource/name/S0008347X19000336supp001.pdf)
Supplement: Supplementary file 1 [file S0008347X19000336supp001.pdf]

## Swede midge (Diptera: Cecidomyiidae) diapause initiation under stable conditions: not a family affair

**Supplementary Table S1.** Recovery and developmental trajectories of swede midges. **A**, Reared under warm, long days ( $24.9 \pm 1.0$  °C, 16.5:7.5 hour light:dark photoperiod; 19 families); **B**, reared under cool, short days ( $13.3 \pm 1.4$  °C, 10:14 hour light:dark photoperiod; 20 families). Individual female swede midges each laid eggs on a cauliflower plant over 48 hours under warm, long-day conditions, with the last day taken as the maternal lay date. Larvae of a given family developed until the third instar wandering stage at which point they were transferred to a lidded cup containing moist peat moss substrate for burrowing. Emerging adults were enumerated, and the peat moss was then sifted to recover any remaining individuals. Diapause larvae were taken as those in spherical cocoons. See the main text for methods details. An asterisk indicates families for which fewer than 10 individuals with known destiny (direct development or diapause) were recovered, and therefore omitted from analyses. L, live; D, dead; M, male; F, female. Note that dead adults were often unable to be sexed.

| <b>A</b>      |                   |                         | Recovery of individuals |           |             |                      |                   |                           |                     |
|---------------|-------------------|-------------------------|-------------------------|-----------|-------------|----------------------|-------------------|---------------------------|---------------------|
| Family number | Maternal lay date | Number of third instars | Larvae L/D              | Pupae L/D | Dead adults | Emerged adults (M/F) | Diapausing larvae | % of family accounted for | Family diapause (%) |
| 1             | 19 August         | 41                      | 5/-                     | 1/1       | 1           | 27 (F)               | -                 | 85                        | 0                   |
| 2             | 19 August         | 67                      | 2/-                     | 1/2       | -           | 62 (M)               | -                 | 100                       | 0                   |
| 3             | 19 August         | 90                      | 7/4                     | -/1       | 1           | 66 (F)               | -                 | 88                        | 0                   |
| 4             | 19 August         | 15                      | 1/-                     | -/1       | -           | 13 (F)               | -                 | 100                       | 0                   |
| 5             | 21 August         | 12                      | 1/-                     | -/1       | -           | 9 (F)                | -                 | 92                        | 0*                  |
| 6             | 21 August         | 16                      | 1/-                     | -/1       | -           | 13 (M)               | -                 | 94                        | 0                   |
| 7             | 21 August         | 19                      | 1/1                     | -/-       | -           | 17 (F)               | -                 | 100                       | 0                   |
| 8             | 21 August         | 12                      | 3/1                     | -/-       | -           | 8 (F)                | -                 | 100                       | 0                   |
| 9             | 23 August         | 54                      | 5/2                     | -/1       | 2           | 42 (F)               | -                 | 96                        | 0                   |
| 10            | 23 August         | 25                      | -/-                     | -/2       | 1           | 19 (F)               | -                 | 88                        | 0                   |
| 11            | 25 August         | 33                      | 3/-                     | -/1       | -           | 31 (F)               | -                 | 100                       | 0                   |
| 12            | 25 August         | 11                      | -/-                     | -/-       | 1           | 8 (M)                | -                 | 82                        | 0*                  |
| 13            | 5 September       | 18                      | -/-                     | -/-       | -           | 18 (F)               | -                 | 100                       | 0                   |
| 14            | 5 September       | 13                      | 3/2                     | -/-       | 2           | 4 (M)                | -                 | 85                        | 0*                  |
| 15            | 7 September       | 10                      | -/-                     | -/1       | -           | 8 (M)                | -                 | 90                        | 0*                  |
| 16            | 7 September       | 10                      | 1/1                     | 1/-       | -           | 6 (M)                | -                 | 90                        | 0*                  |
| 17            | 9 September       | 19                      | 1/-                     | -/1       | -           | 16 (F)               | -                 | 95                        | 0                   |
| 18            | 9 September       | 20                      | 1/1                     | -/-       | -           | 18 (F)               | -                 | 100                       | 0                   |
| 19            | 13 September      | 17                      | 2/-                     | -/-       | -           | 11 (M)               | 2                 | 75                        | 15                  |

# Swede midge (Diptera: Cecidomyiidae) diapause initiation under stable conditions: not a family affair

| <b>B</b>      |                   |                         | Recovery of individuals |           |             |                      |                   |                           |                     |
|---------------|-------------------|-------------------------|-------------------------|-----------|-------------|----------------------|-------------------|---------------------------|---------------------|
| Family number | Maternal lay date | Number of third instars | Larvae L/D              | Pupae L/D | Dead adults | Emerged adults (M/F) | Diapausing larvae | % of family accounted for | Family diapause (%) |
| 1             | 19 August         | 46                      | 6/7                     | -/3       | 2           | 7 (F)                | 14                | 85                        | 54                  |
| 2             | 19 August         | 37                      | 4/1                     | -/-       | -           | -                    | 27                | 89                        | 100                 |
| 3             | 19 August         | 61                      | 5/2                     | -/1       | -           | 8 (F)                | 37                | 87                        | 80                  |
| 4             | 19 August         | 18                      | -/-                     | -/-       | -           | 2 (F)                | 16                | 100                       | 89                  |
| 5             | 21 August         | 19                      | 3/1                     | -/-       | -           | 2 (F)                | 6                 | 67                        | 75*                 |
| 6             | 23 August         | 57                      | 6/2                     | -/-       | -           | -                    | 41                | 86                        | 100                 |
| 7             | 23 August         | 17                      | 1/2                     | -/-       | -           | 6 (F)                | 8                 | 100                       | 57                  |
| 8             | 25 August         | 31                      | 1/1                     | -/-       | -           | 4 (1M,3F)            | 19                | 81                        | 83                  |
| 9             | 27 August         | 27                      | -/1                     | 1/2       | 1 (M)       | 5 (4M,1F)            | 5                 | 56                        | 36                  |
| 10            | 27 August         | 53                      | 2/-                     | -/-       | -           | 5 (M)                | 46                | 100                       | 90                  |
| 11            | 5 September       | 32                      | 1/-                     | -/-       | -           | -                    | 29                | 94                        | 100                 |
| 12            | 5 September       | 20                      | 1/1                     | -/-       | -           | 2 (F)                | 14                | 90                        | 88                  |
| 13            | 7 September       | 17                      | 1/3                     | -/-       | -           | -                    | 1                 | 29                        | 100*                |
| 14            | 7 September       | 10                      | 2/1                     | -/1       | -           | -                    | 2                 | 60                        | 67*                 |
| 15            | 7 September       | 18                      | -/-                     | -/-       | -           | -                    | 15                | 83                        | 100                 |
| 16            | 9 September       | 11                      | -/-                     | -/1       | -           | 1 (M)                | 7                 | 82                        | 78*                 |
| 17            | 11 September      | 40                      | -/-                     | -/1       | -           | 1 (F)                | 38                | 100                       | 95                  |
| 18            | 11 September      | 23                      | 1/2                     | -/2       | -           | 1 (F)                | 13                | 83                        | 81                  |
| 19            | 13 September      | 28                      | 2/-                     | -/1       | -           | -                    | 23                | 93                        | 96                  |
| 20            | 13 September      | 21                      | 3/1                     | -/1       | -           | 2 (1M,1F)            | 11                | 86                        | 79                  |
